# Supplementary material for: Edible applications of shellac oleogels: spreads, chocolate paste and cakes
Source: Royal Society of Chemistry journal article supplement (doi:10.1039/c4fo00034j), 2014-01-01
Supplement: c4fo00034j1.pdf [file c4fo00034j1.pdf]

**Table S1:** Recipe for chocolate pastes

|                                | <b>Standard</b> | <b>Shellac-Oleogel</b> |
|--------------------------------|-----------------|------------------------|
| Sugar                          | 48.85 %         | 48.85 %                |
| Cocoa powder                   | 7 %             | 7 %                    |
| Skimmed milk powder            | 8 %             | 8 %                    |
| Hazelnut paste                 | 12 %            | 12 %                   |
| Palsgaard PGPR 4125            | 0.15 %          | 0.15 %                 |
| Palsgaard AMP 4448             | 0.5 %           | 0.5 %                  |
| <b>Palsgaard Oil Binder 01</b> | <b>1.5 %</b>    | -                      |
| <b>Shellac</b>                 | -               | <b>1.5 %</b>           |
| <b>Palm oil</b>                | <b>22 %</b>     | <b>16 %</b>            |
| <b>Rapeseed oil</b>            | -               | <b>6%</b>              |
| <b>Total</b>                   | <b>100</b>      | <b>100</b>             |

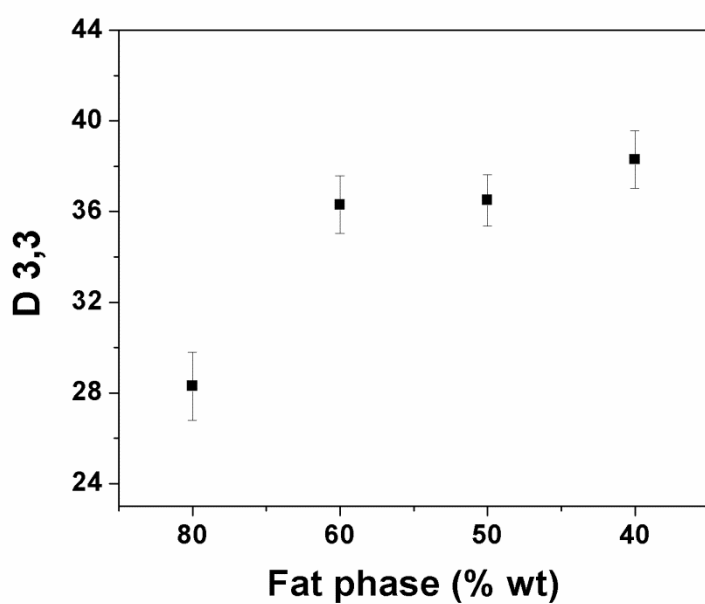

**Figure S1:** Volume weighted mean droplet size of emulsions made with different level of water and fat phase.

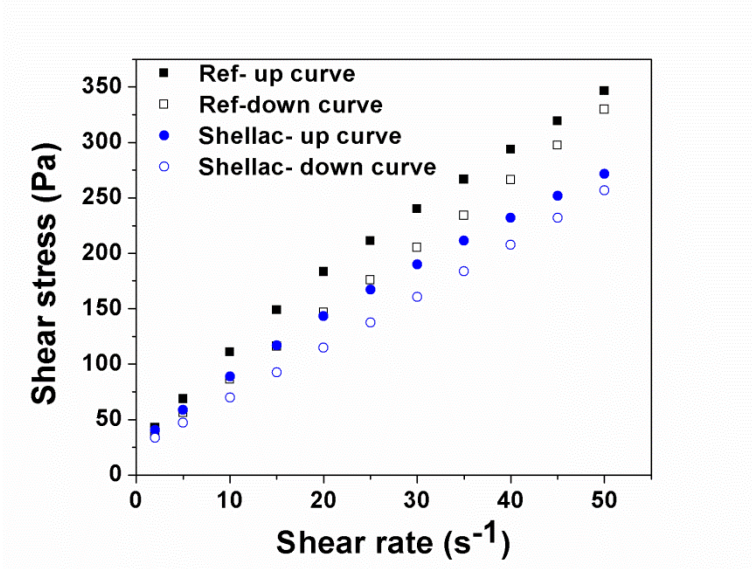

Figure S2: Flow curves of reference chocolate paste and paste prepared using shellac oleogel.

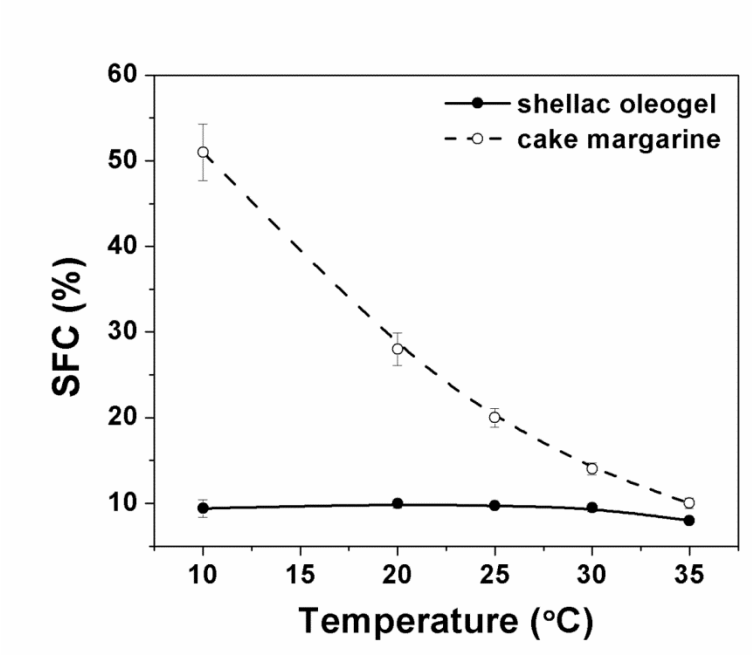

Figure S3: SFC curves for fat phase of cake margarine and shellac oleogel-based emulsion used as shortening for cakes.
